# Supplementary material for: Modeling MEN1 with Patient-Origin iPSCs Reveals GLP-1R Mediated Hypersecretion of Insulin
Source: MDPI journal article supplement (doi:10.3390/cells11152387), 2022-08-03
Supplement: s1 [file s1]

# Modeling MEN1 with Patient-Origin iPSCs Reveals GLP-1R Mediated Hypersecretion of Insulin

## Supplementary Materials

**Table S1.** Antibodies used in the study.

| Primary                     | Source                    | Cat. No.   |
|-----------------------------|---------------------------|------------|
| Goat Anti-Sox17             | R&D                       | AF1924     |
| Rabbit Anti-FoxA2           | Genetex                   | GTX84485   |
| Goat Anti-Pdx1              | R&D                       | AF2419     |
| Rabbit Anti-SOX9            | Abcam                     | AB185230   |
| Mouse Anti-Glucagon         | Abcam                     | R0539L-1   |
| Rabbit Anti-Insulin         | Cell Signaling Technology | 3014       |
| Mouse Anti-Ki67             | GeneTex                   | MKi67/2462 |
| Rabbit Anti-FOXO1           | Cell Signaling Technology | 2880       |
| Rabbit Anti-pFOXO1          | Cell Signaling Technology | 9461       |
| Rabbit Anti-CREB            | Cell Signaling Technology | 9197       |
| Rabbit Anti-pCREB           | Cell Signaling Technology | 9198       |
| Rabbit Anti-AKT-pan         | Cell Signaling Technology | 4691       |
| Rabbit Anti-AKT-S473        | Cell Signaling Technology | 4060       |
| Rabbit Anti-AKT-T308        | Cell Signaling Technology | 13038      |
| Rabbit Anti-OCT4            | GeneTex                   | GTX101497  |
| Rabbit Anti-Nanog           | Cell Signaling Technology | 4903S      |
| Rabbit Anti-GLP-1R          | Proteintech               | 26196-1-AP |
| Mouse Anti-PCNA             | Abcam                     | ab29       |
| Rabbit Anti-Chromogranin A  | Abcam                     | ab254557   |
| Rabbit Anti-GLP-1           | Abcam                     | ab22625    |
| Rabbit Anti-PCSK1(PC1/3)    | Boster                    | BA2848     |
| PE Mouse Anti-Human CD49a   | BD Pharmingen             | V S223     |
| Rabbit Anti-NKX6.1          | Cell Signaling Technology | 54551S     |
| HRP-conjugated Beta Tubulin | Proteintech               | HRP-66240  |
| HRP-conjugated Beta Actin   | Proteintech               | HRP-60008  |
| HRP-conjugated Gapdh        | Proteintech               | HRP-60004  |
| Donkey Anti-Rabbit 568      | Life                      | A21206     |
| Donkey Anti-Goat 488        | Life                      | A11057     |
| Donkey Anti-Mouse 488       | Life                      | A21202     |
| Donkey Anti-Mouse 568       | Life                      | A10037     |
| Donkey Anti-Rabbit 488      | Life                      | A21206     |
| Goat Anti-Rabbit HRP        | Kangcheng                 | KC-RB-035  |
| Goat Anti-Mouse HRP         | Kangcheng                 | KC-MM-035  |

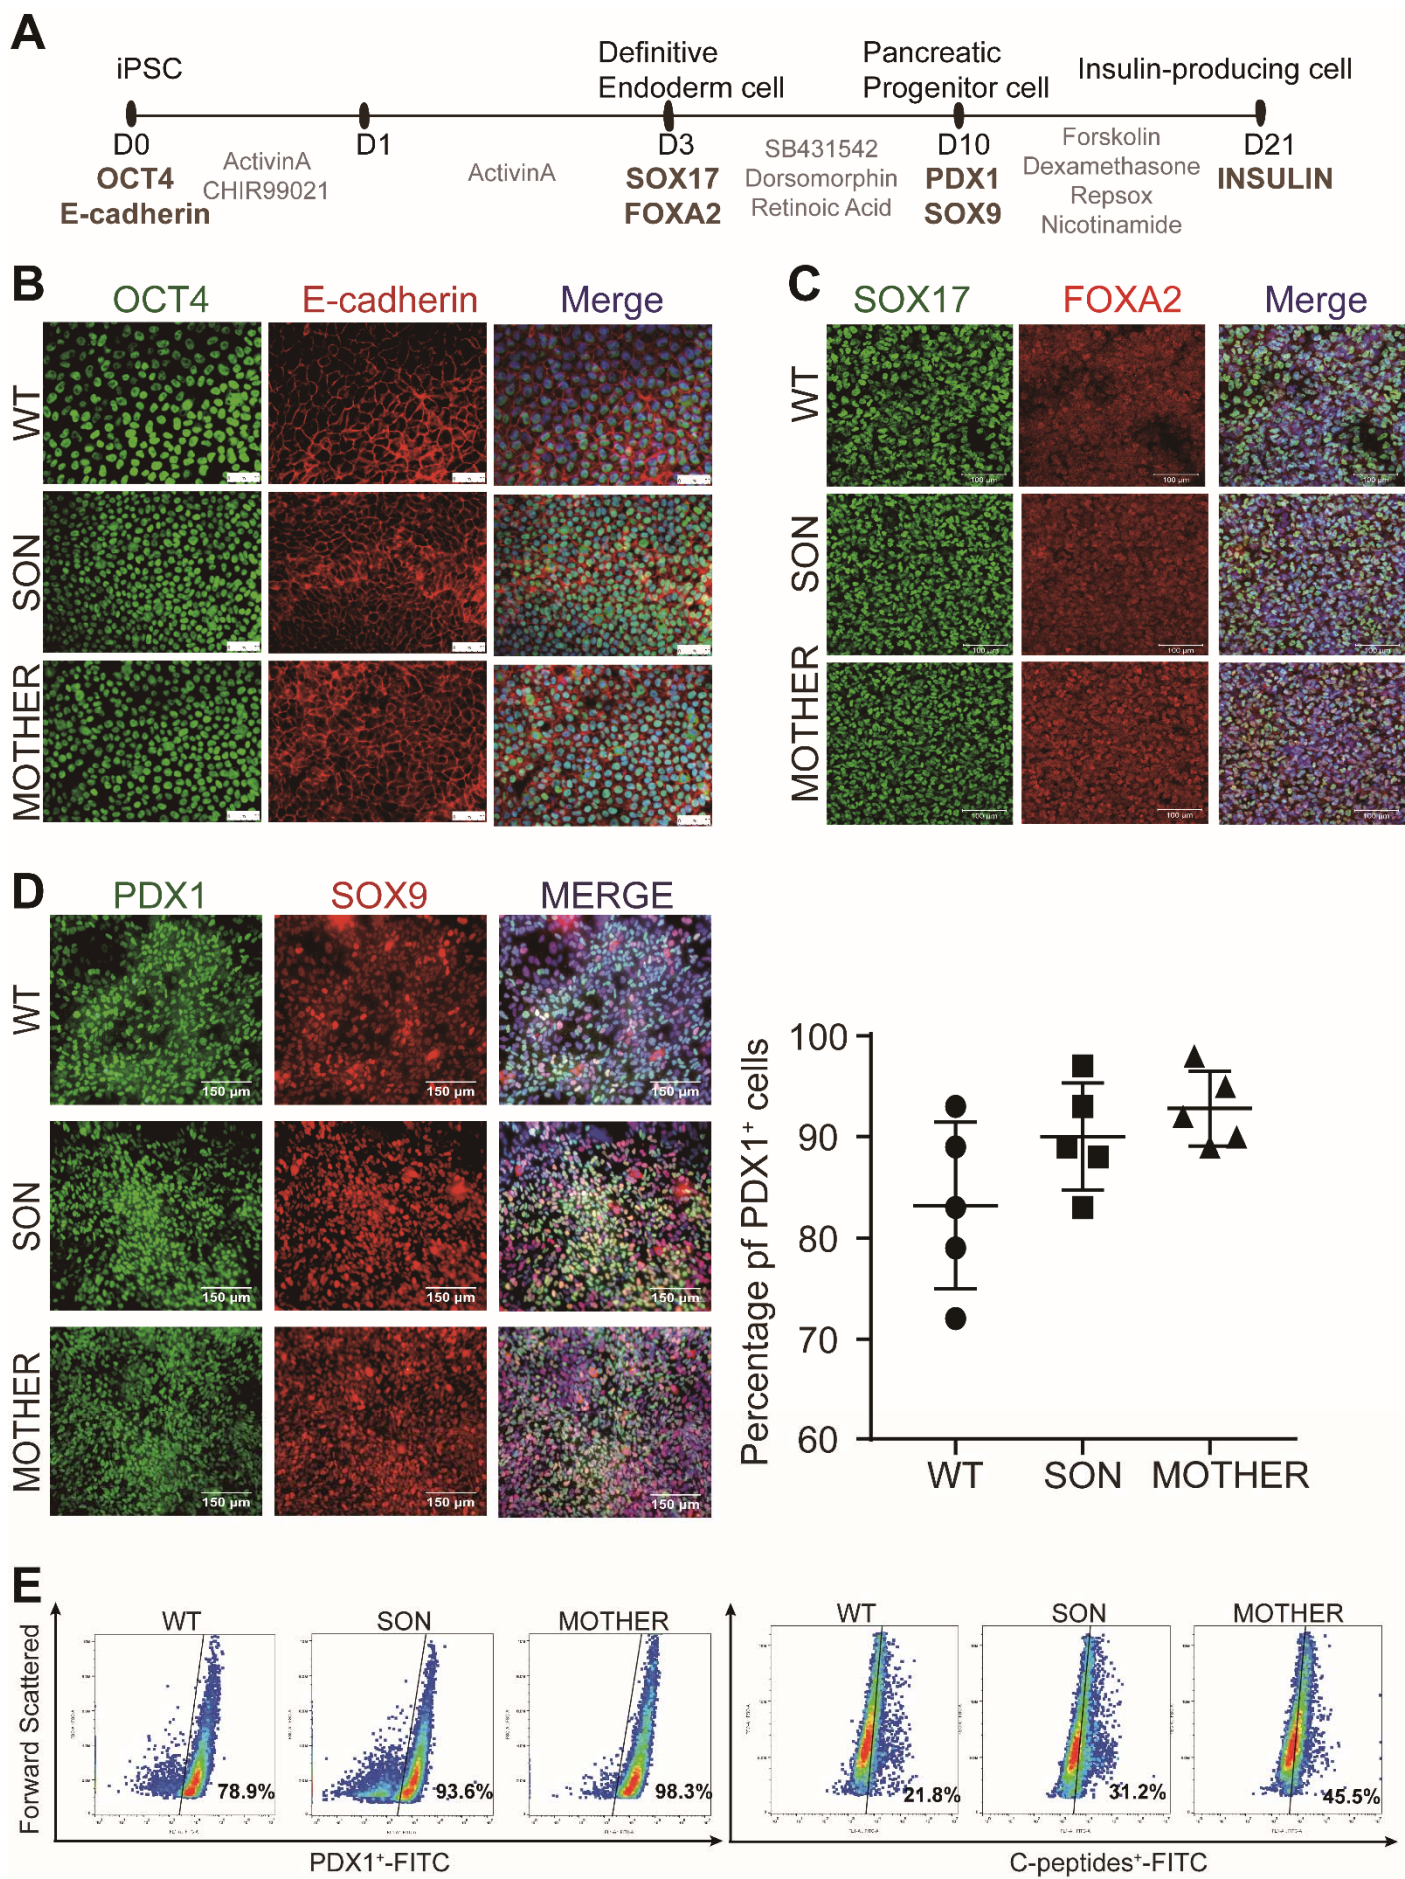



**Figure S1.** MEN1-iPSCs had the same pluripotency in stem cell stage and similar differentiation efficiency in DEC stage, scale bar: 50 $\mu$ m; (A) The stepwise pancreatic differentiation protocol of iPSCs is illustrated. (B) The pluripotency of iPSCs was analyzed by E-cadherin and OCT4 immunostaining, scale bar: 100 $\mu$ m. (C) The definitive endoderm cell stage was identified by FOXA2 and SOX17 immunostaining, scale bar: 150 $\mu$ m. (D) The pancreatic progenitor stage (Day 10) was identified by PDX1/SOX9 immunostaining,  $n = 5$ . (E) Analysis of PDX1 in Day 10 and insulin in Day 21 by flow cytometer. The bar plots ( $n \geq 3$  wells per group) are mean  $\pm$  SEM.

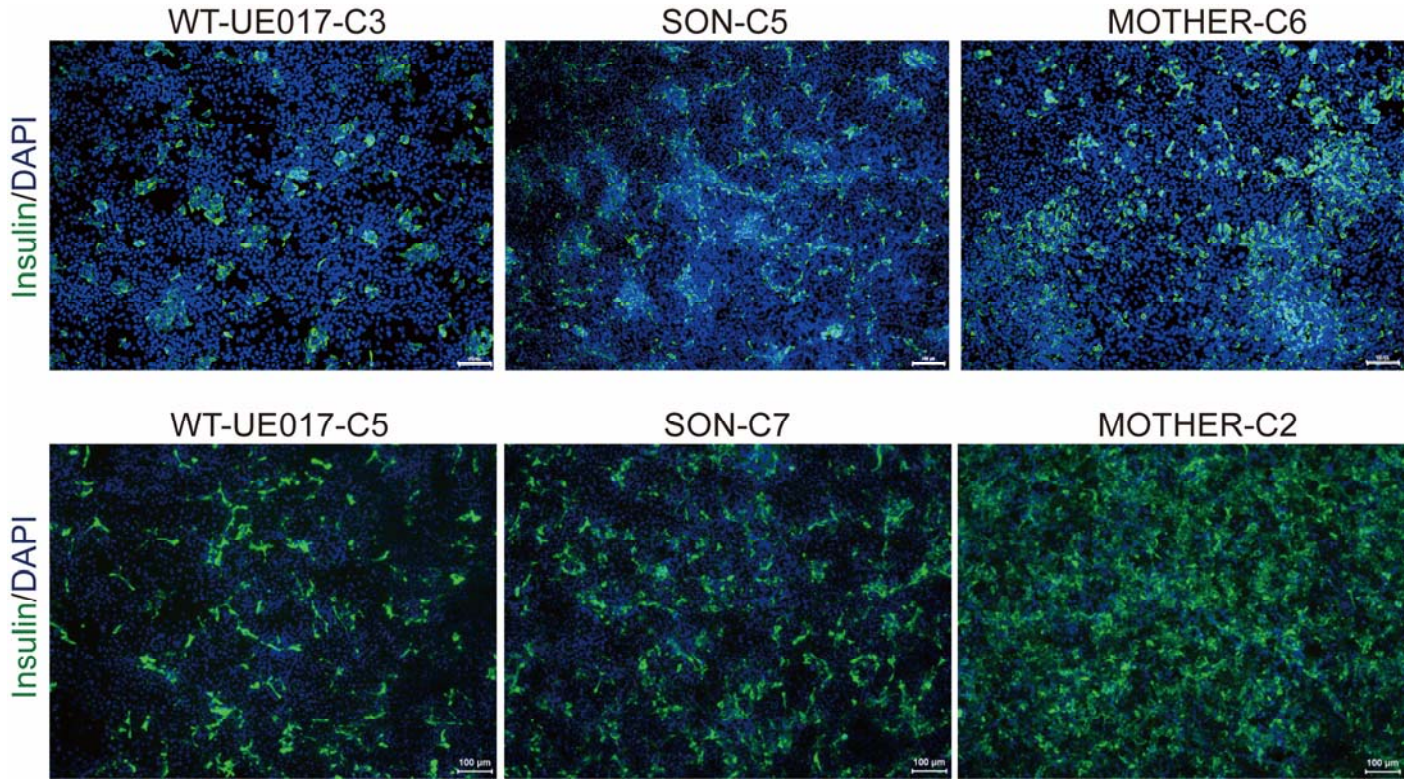

**Figure S2.** Significant increased insulin production of MEN1-IPCs from two more iPSC lines from each patient compared with two more wild type lines, scale bar: 100 $\mu$ m.

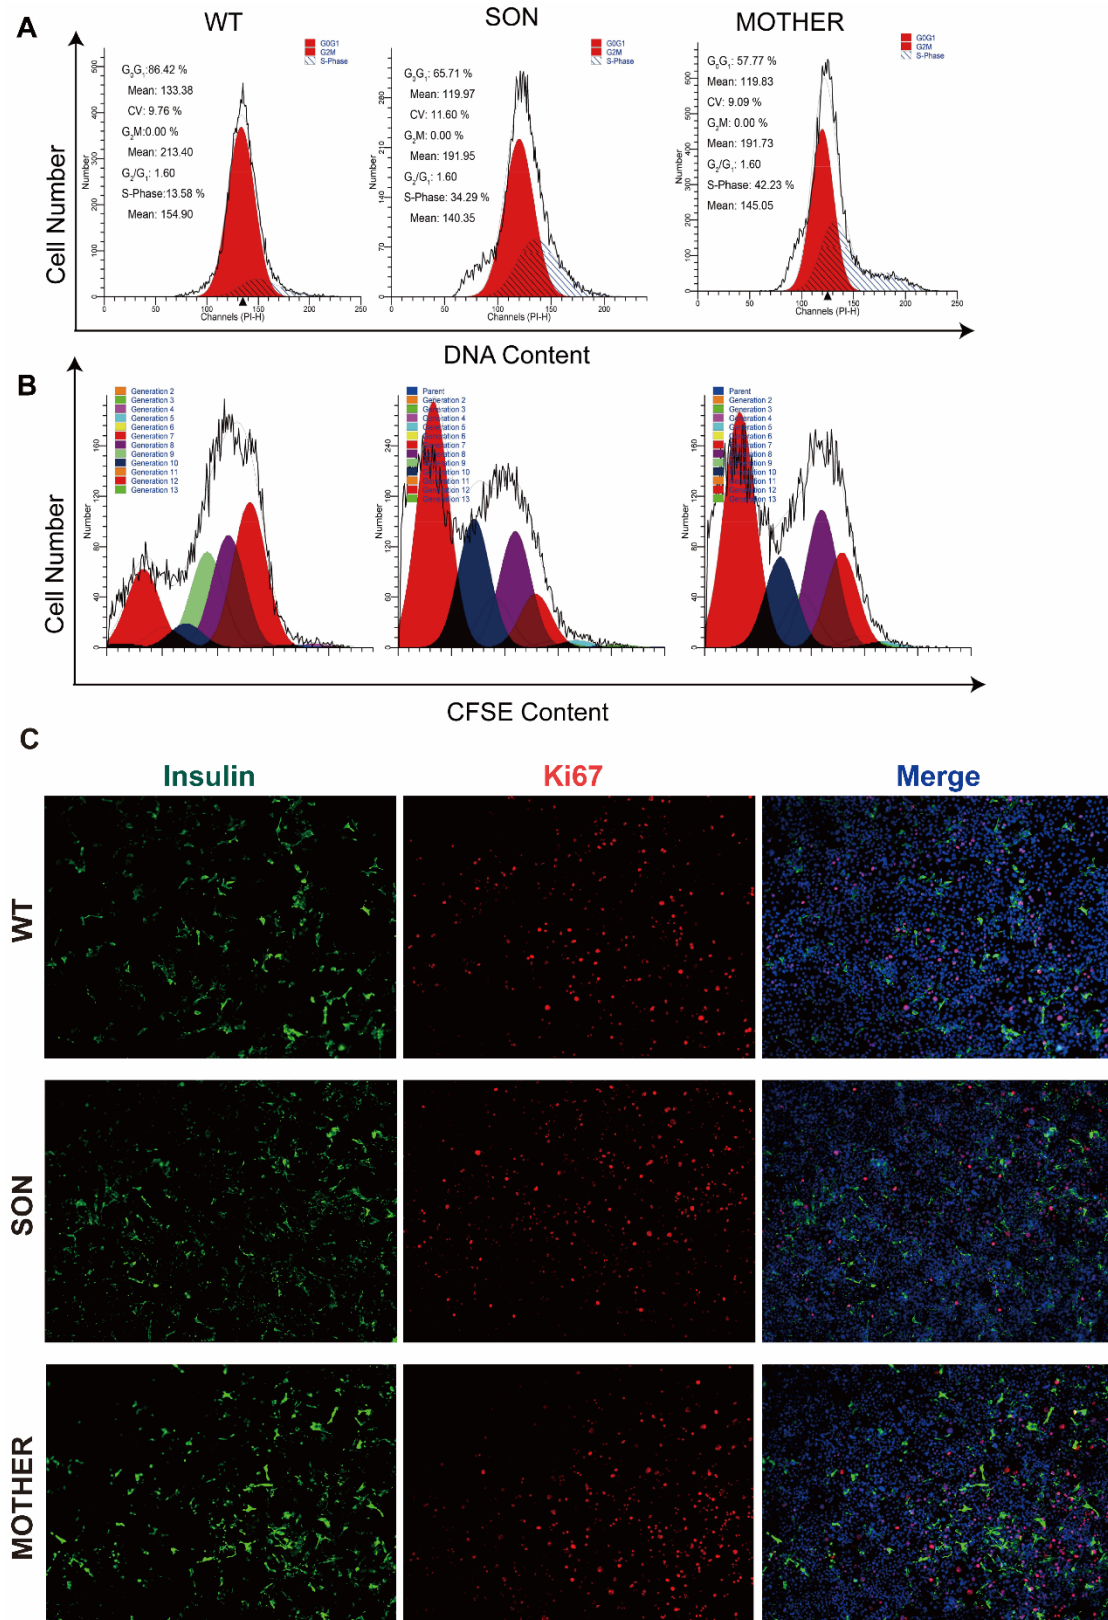

**Figure S3.** Increased proliferative rate in MEN1-derived cells. **(A)** Flow cytometer analysis of DNA content to identify cell cycle by PI in Day 10. **(B)** Flow cytometer analysis of cell proliferation by CFSE from Day 7–15. **(C)** The proliferation of IPC stage was identified by Ki67 and insulin.

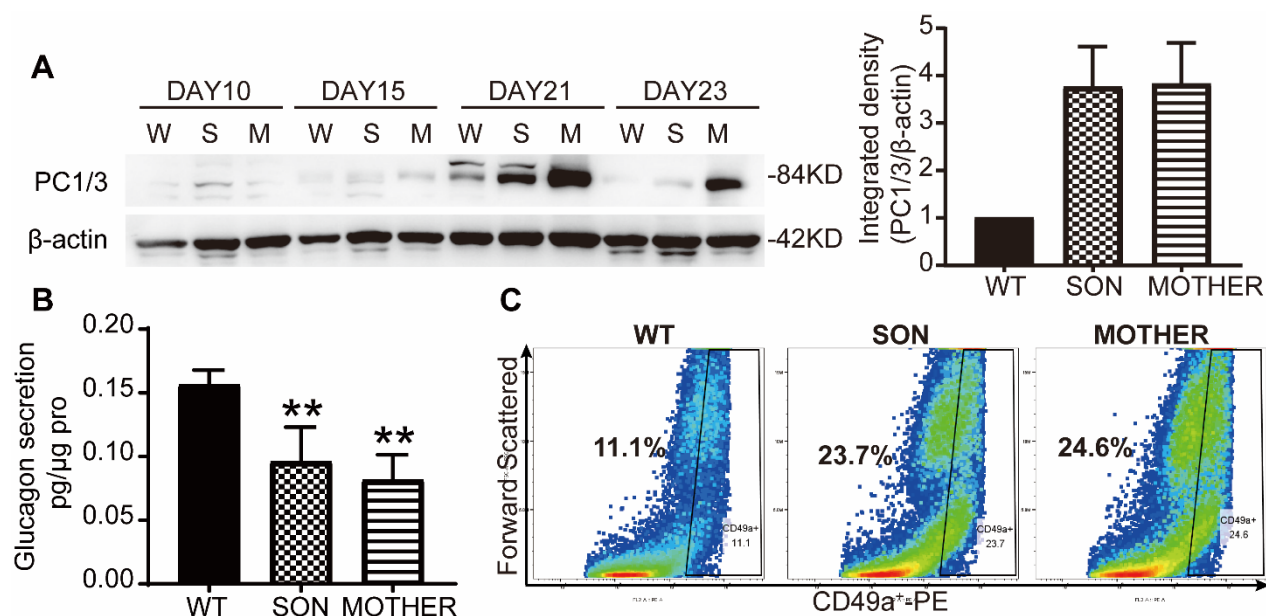

**Figure S4.** Upregulation of GLP-1 signaling in MEN1-derived cells. (A) The expression of PC1/3 during the differentiation process ( $n = 3$ ). (B) ELISA assay of glucagon secretion in supernatant of Day 21 ( $n = 3$ ). (C) Cell-sorting by CD49a<sup>+</sup> in Day 21 by flow cytometer. The bar plots ( $n \geq 3$  wells per group) are mean  $\pm$  SEM.

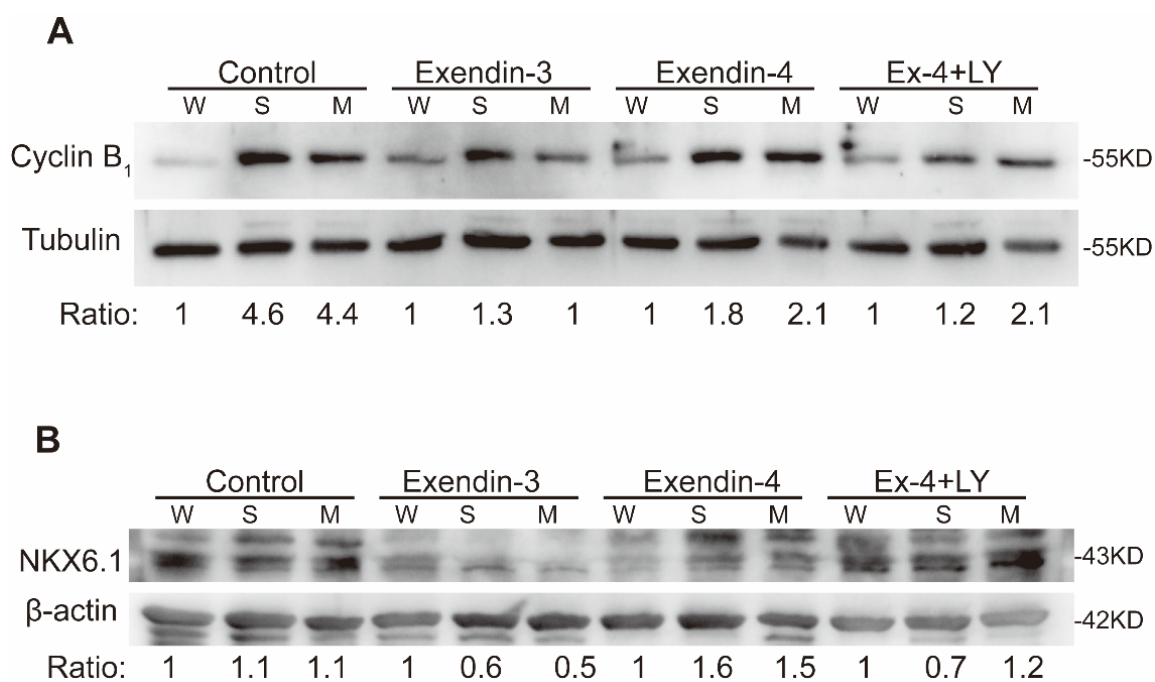

**Figure S5.** Exendin-3 (9-39) inhibited the MEN1-derived cells into  $\beta$ -cells via inhibition on proliferation. (A) The expression of Cyclin B<sub>1</sub> in IPCs treated with Exendin-3 (9-39), Exendin-4, or Exendin-4 + LY294002. (B) The expression of  $\beta$ -cells specific marker NKX6.1 in IPC stage treated with Exendin-3 (9-39), Exendin-4, or Exendin-4 + LY294002.



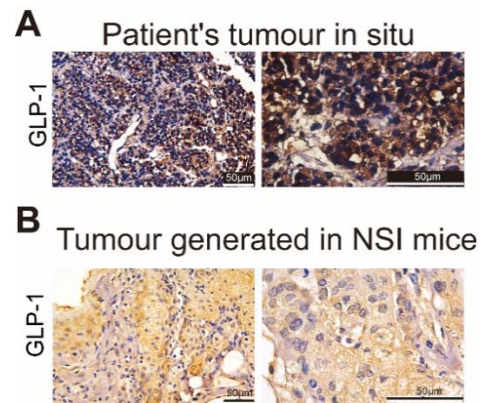

**Figure S6.** The expression of GLP-1 was strong in MEN1-relative tumors. The immunostaining of GLP-1 from patient tumor of SON sample (**A**) and tumor generated in NSI mice after SON-IPCs transplantation (**B**), scale bar: 50µm.
